# Supplementary material for: Small emission sources disproportionately account for a large majority of total methane emissions from the US oil and gas sector
Source: Copernicus journal article supplement (doi:10.5194/egusphere-2024-1402), 2024-05-22
Supplement: Supplementary file 1 [file egusphere-2024-1402-supplement.pdf]

## Supplementary Figures

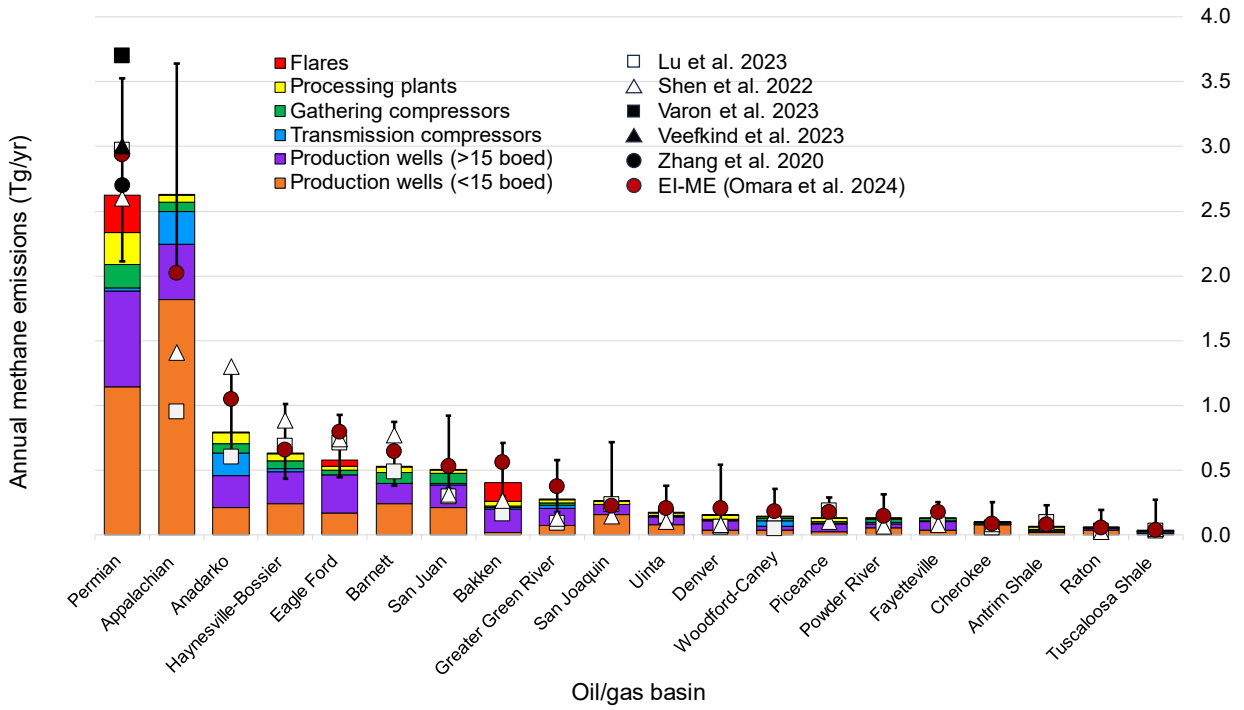

**Figure S1:** Total methane emissions for different oil/gas basin boundaries from our facility-level model results colored according to the emitting facility category with uncertainty bars (i.e., 95% c.i.) Other satellite-based studies are included for basin-level comparisons, except for the EI-ME (Omara et al., 2024) which estimates basin-level emissions using a measurement-based facility-level approach.

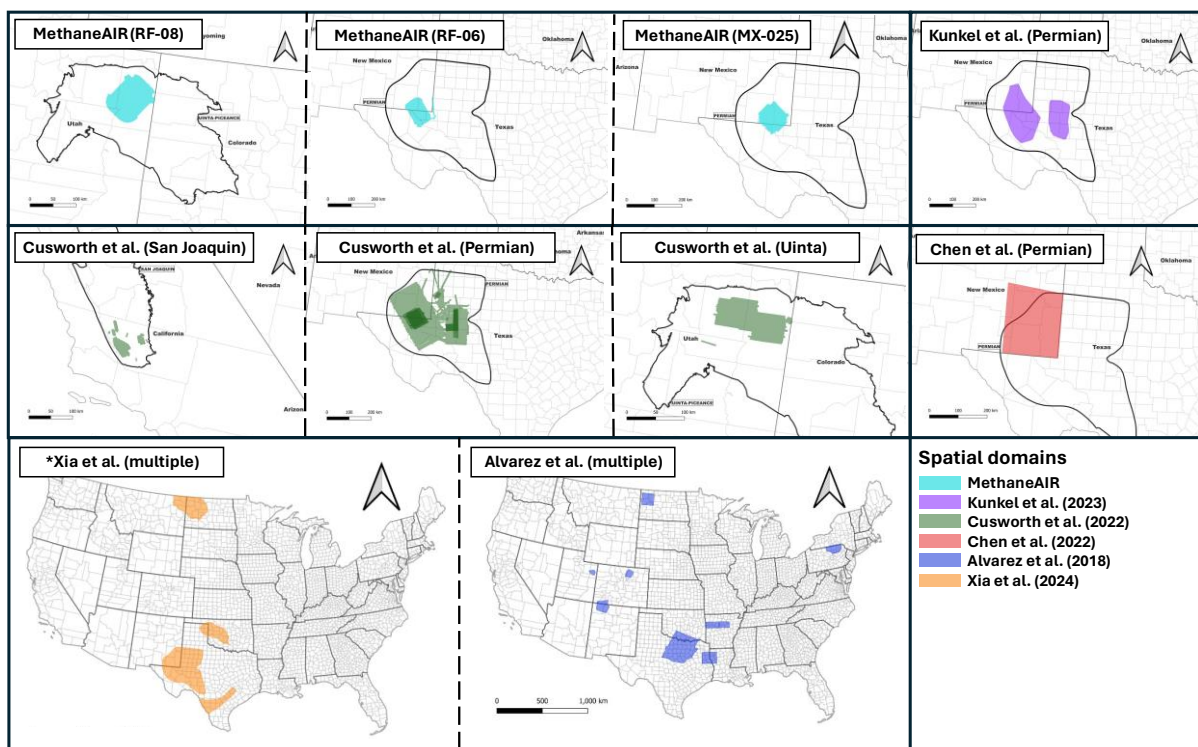

**Figure S2:** Spatial boundaries of remote sensing studies used for comparisons in Table S2, Fig. 7, and Fig. 8.

\*Spatial boundaries outlined by Xia et al. (2024) represent the measured oil/gas basins in their work, but not specifically the outlines of the flown boundaries within those oil/gas boundaries.

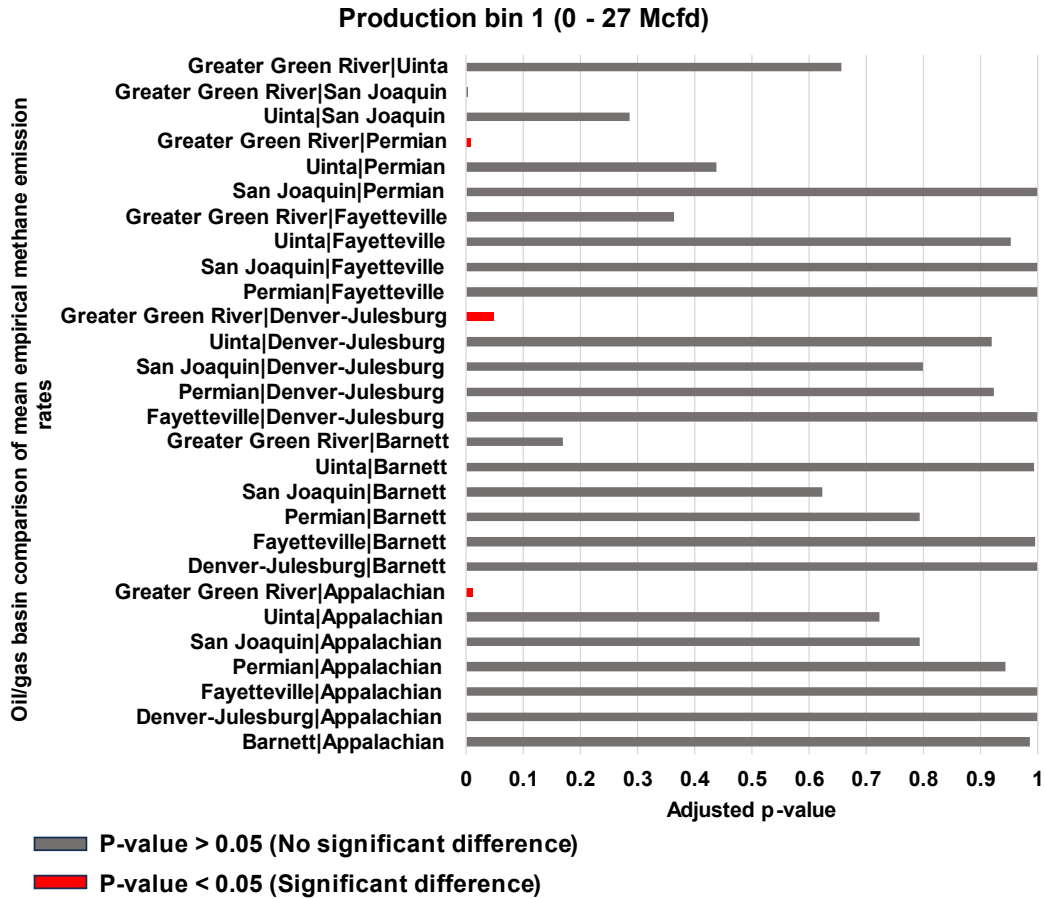

**Figure S3:** Results of Tukey honest significance test showing the significance of differences between mean well site empirical emission rates gathered from different oil/gas basins for the first production cohort of well sites (0 – 27 Mcfd). P-values below 0.05 imply a significant difference between mean emission rates for different oil/gas basins, and p-values above 0.05 imply no significant difference. The number of measurements available for each comparison can be found in Table S2.

### Production bin 2 (27 - 84 Mcfd)

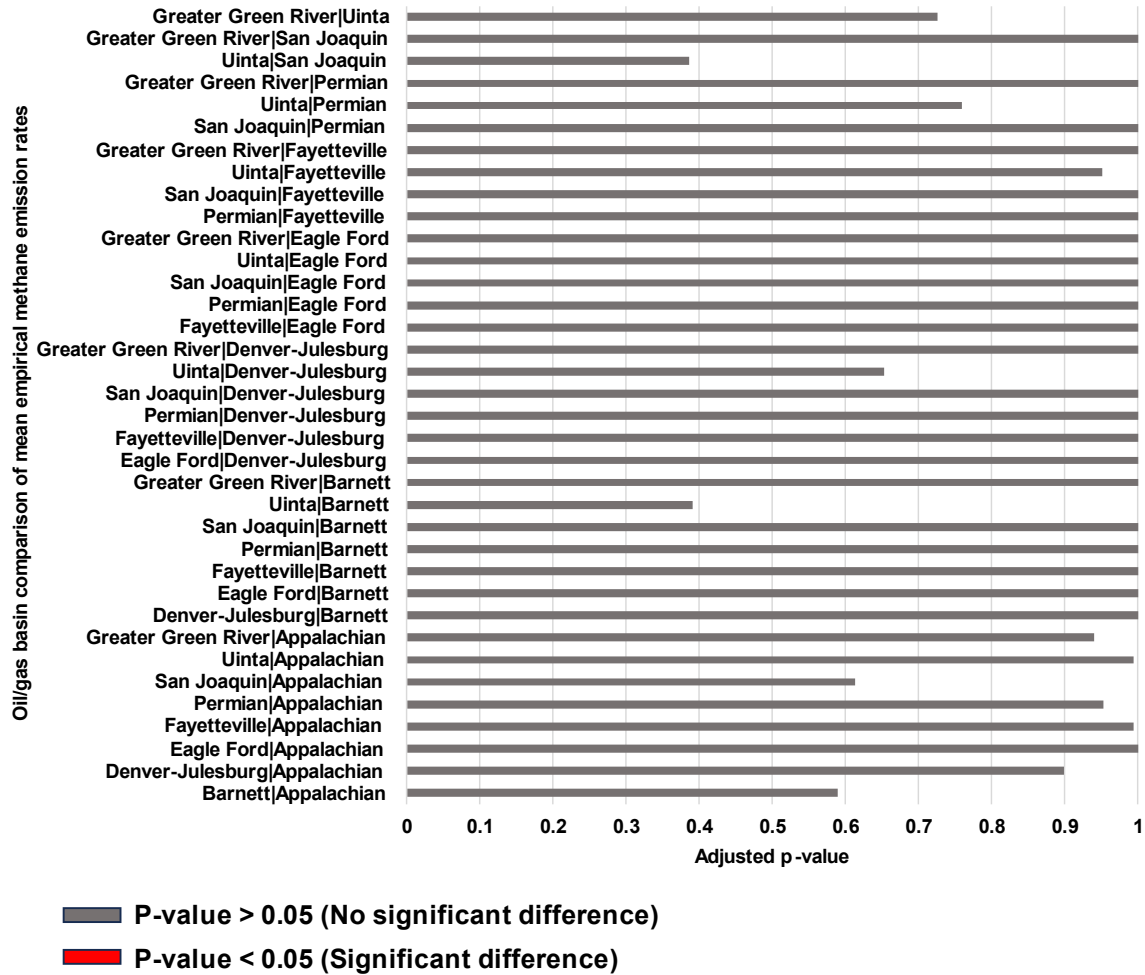

**Figure S4:** Results of Tukey honest significance test showing the significance of differences between mean well site empirical emission rates gathered from different oil/gas basins for the second production cohort of well sites (27 – 84 Mcfd). P-values below 0.05 imply a significant difference between mean emission rates for different oil/gas basins, and p-values above 0.05 imply no significant difference. The number of measurements available for each comparison can be found in Table S2.

### Production bin 3 (84 - 330 Mcfd)

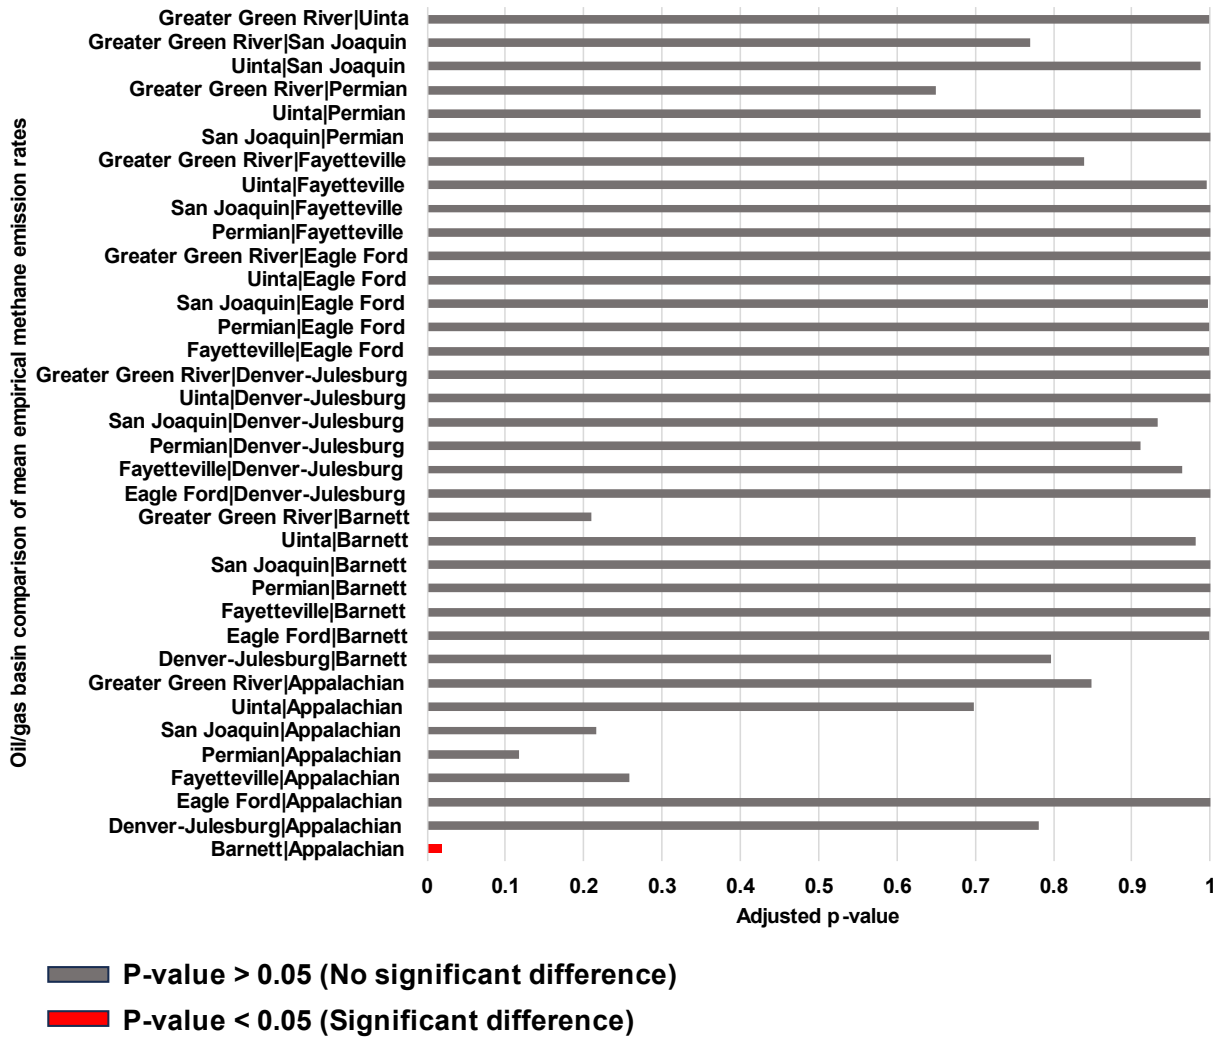

**Figure S5:** Results of Tukey honest significance test showing the significance of differences between mean well site empirical emission rates gathered from different oil/gas basins for the third production cohort of well sites (84 – 330 Mcfd). P-values below 0.05 imply a significant difference between mean emission rates for different oil/gas basins, and p-values above 0.05 imply no significant difference. The number of measurements available for each comparison can be found in Table S2.

### Production bin 4 (330– 1,200 Mcfd)

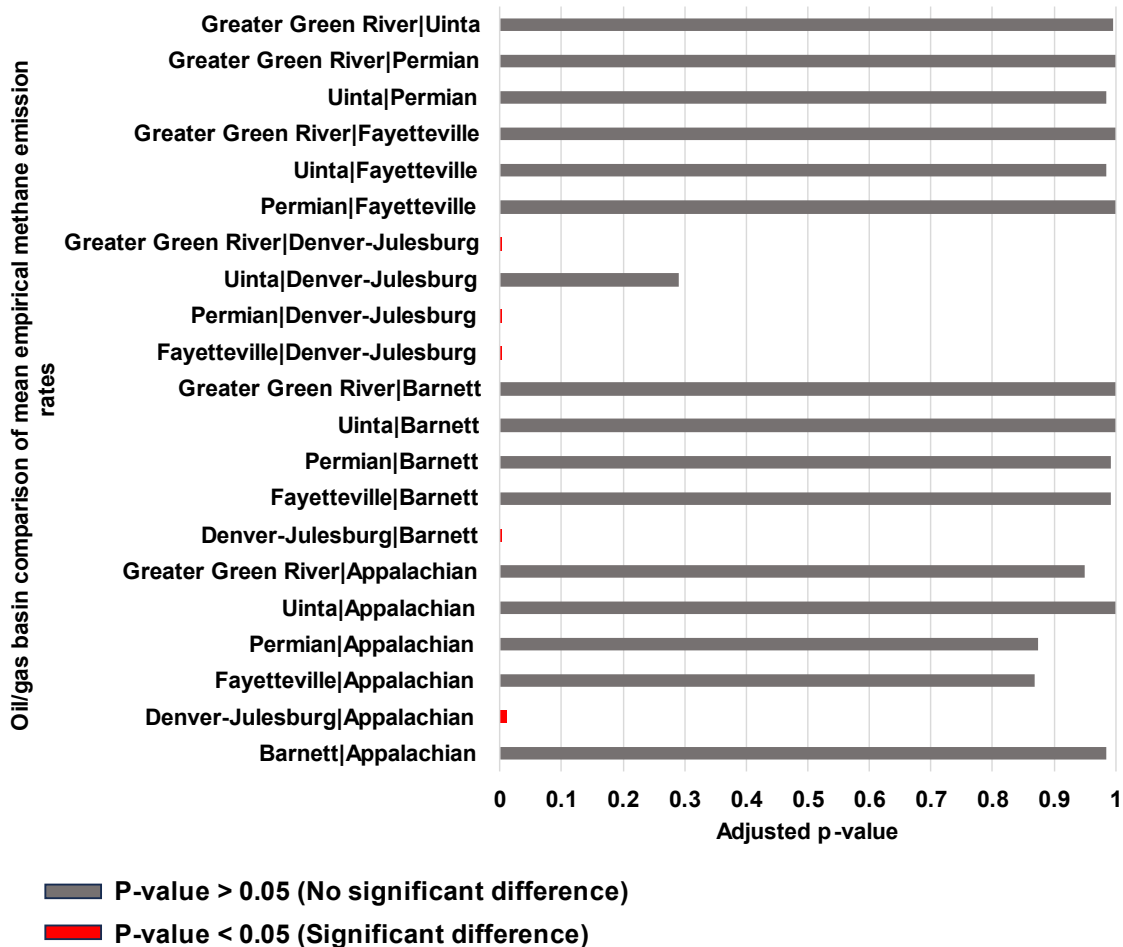

**Figure S6:** Results of Tukey honest significance test showing the significance of differences between mean well site empirical emission rates gathered from different oil/gas basins for the fourth production cohort of well sites (330 – 1,200 Mcfd). P-values below 0.05 imply a significant difference between mean emission rates for different oil/gas basins, and p-values above 0.05 imply no significant difference. The number of measurements available for each comparison can be found in Table S2.

### Production bin 5 (1,200- 3,864 Mcfd)

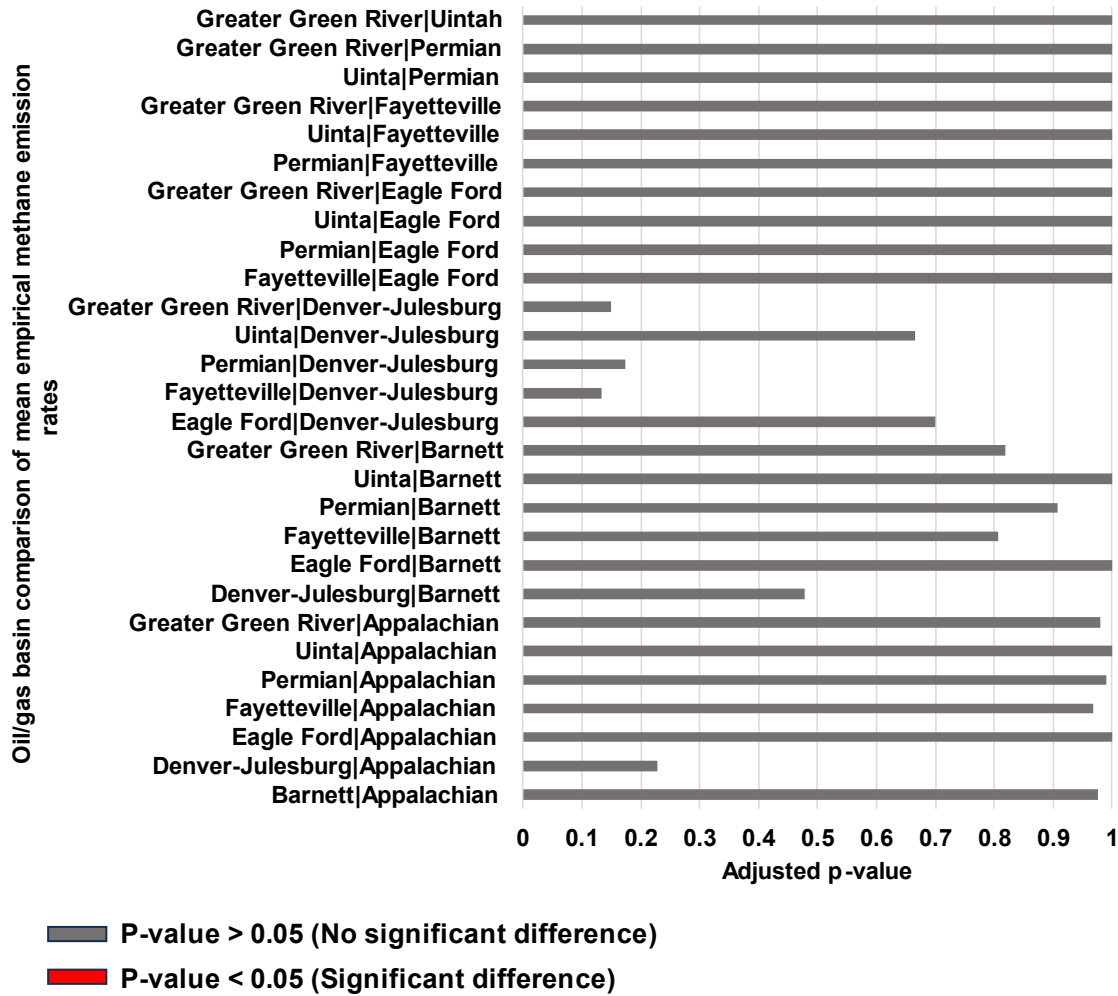

**Figure S7:** Results of Tukey honest significance test showing the significance of differences between mean well site empirical emission rates gathered from different oil/gas basins for the fifth production cohort of well sites (1,200 – 3,864 Mcfd). P-values below 0.05 imply a significant difference between mean emission rates for different oil/gas basins, and p-values above 0.05 imply no significant difference. The number of measurements available for each comparison can be found in Table S2.

### Production bin 6 (>3,864 Mcfd)

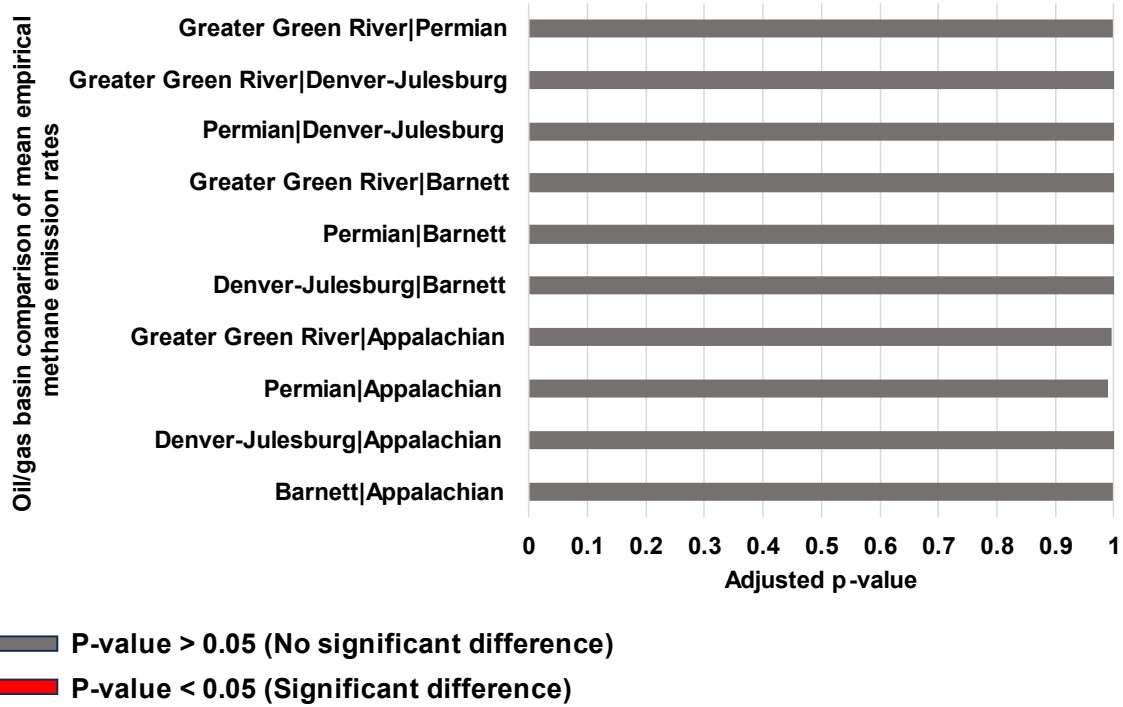

**Figure S8:** Results of Tukey honest significance test showing the significance of differences between mean well site empirical emission rates gathered from different oil/gas basins for the sixth and highest production cohort of well sites (> 3,864 Mcfd). P-values below 0.05 imply a significant difference between mean emission rates for different oil/gas basins, and p-values above 0.05 imply no significant difference. The number of measurements available for each comparison can be found in Table S2.



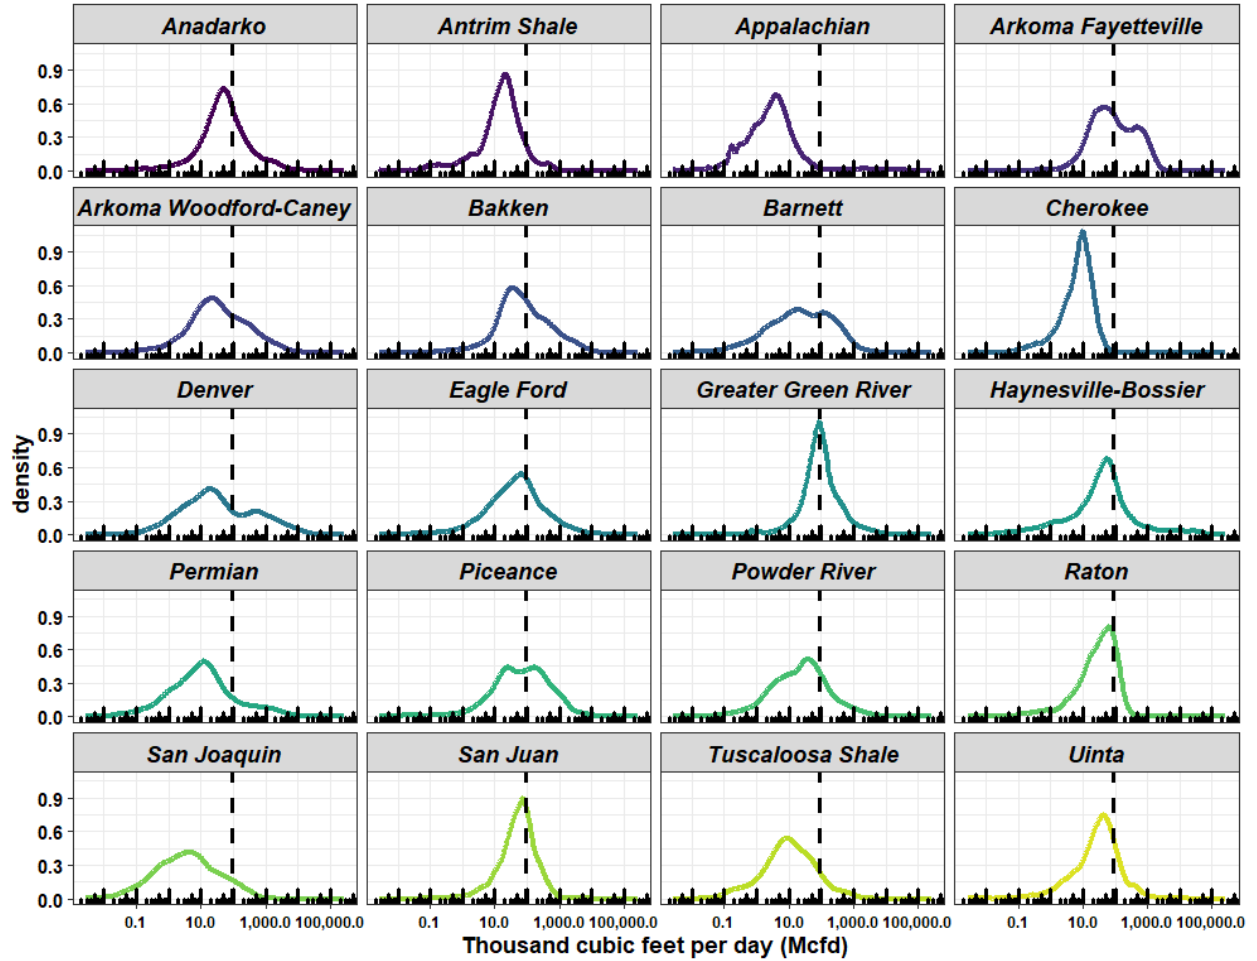

**Figure S9:** Kernel densities of well site level gas production (Mcf/d) for US oil/gas producing basins to illustrate differences in production characteristics among basins. For reference, the black segmented lines represent a gas production value of 90 Mcfd, which corresponds to 15 barrels of oil equivalent per day.

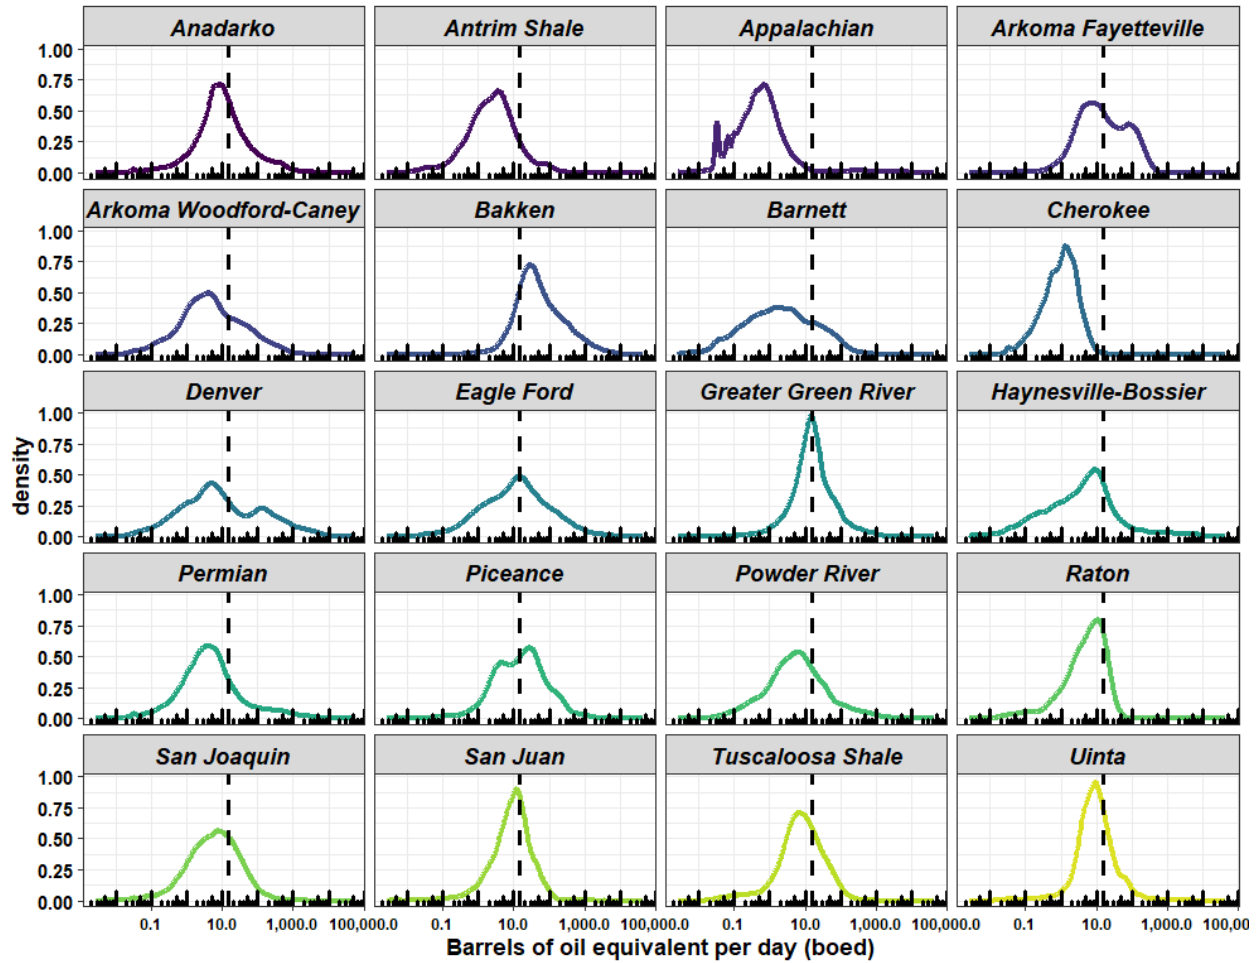

**Figure S10:** Kernel densities of well site level combined oil and gas production (boed) for US oil/gas producing basins to illustrate differences in production characteristics among basins. For reference, the black segmented lines represent a gas production value of 15 boed.

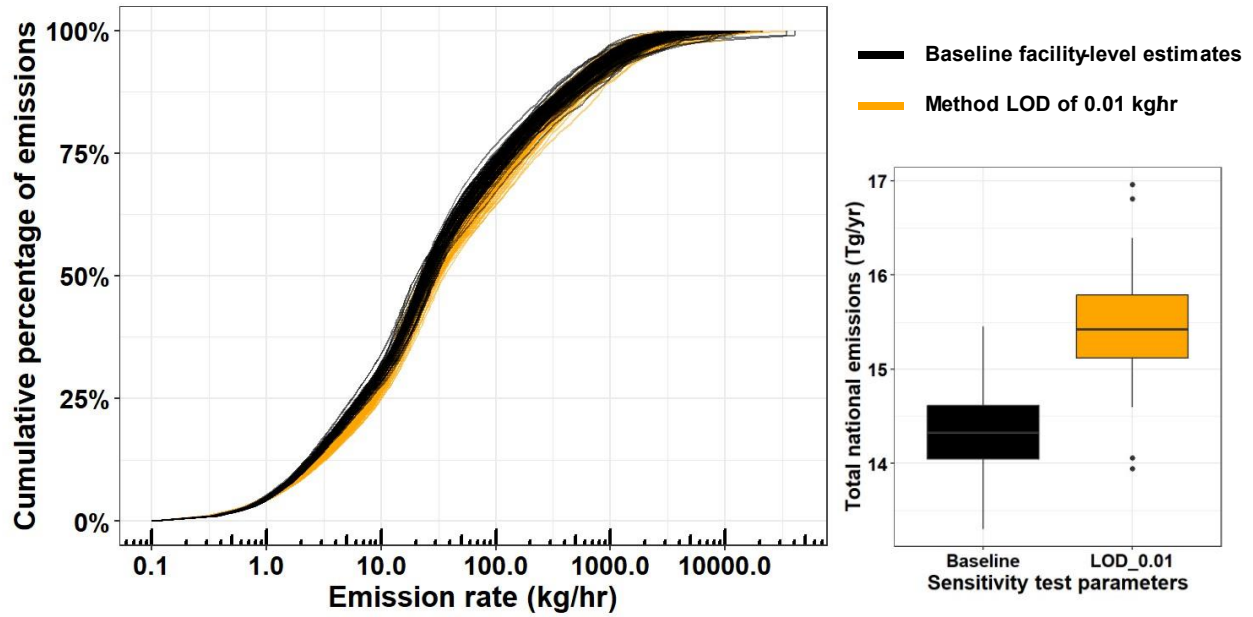

**Figure S11:** Results of a sensitivity analysis of the method limit of detection used in the facility-level estimates for both the national level oil/gas methane emission distributions (left) and total national methane emissions (right..). A method LOD of 0.01 kg/hr was tested (orange) against the baseline LOD of 0.1 kg/hr (black) for 100 model estimates each.

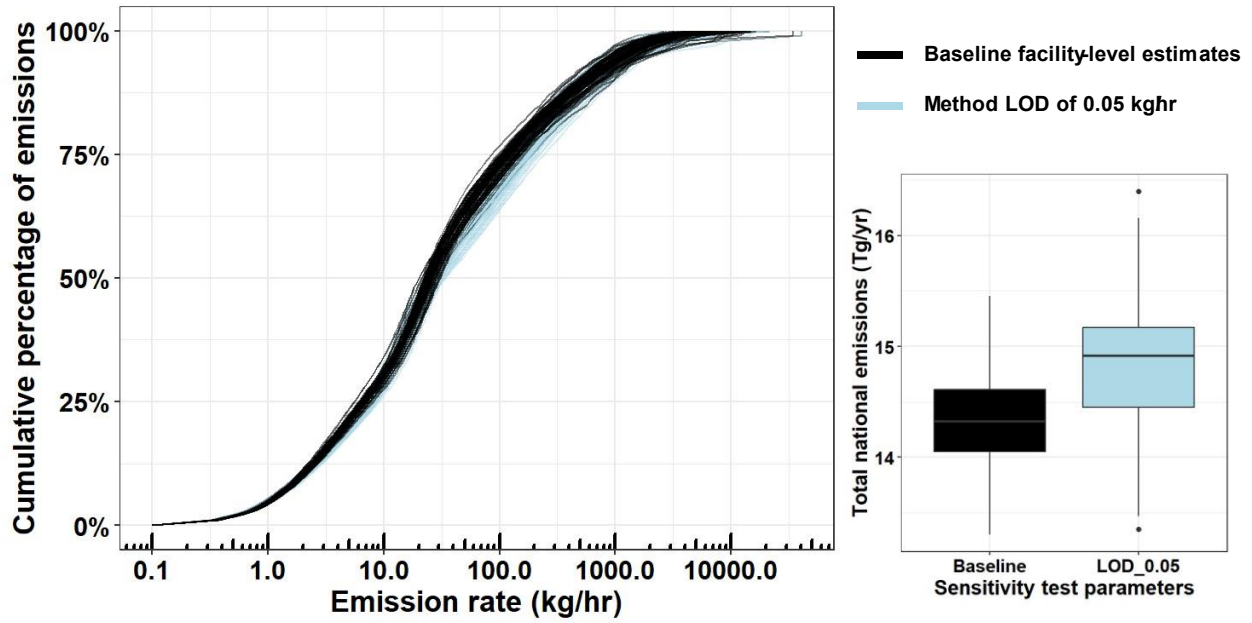

**Figure S12:** Results of a sensitivity analysis on the method limit of detection used in the facility-level estimates for both the national level oil/gas methane emission distributions (left) and total national methane emissions (right). A method LOD of 0.05 kg/hr was tested (light blue) against the baseline LOD of 0.1 kg/hr (black) for 100 model estimates each.

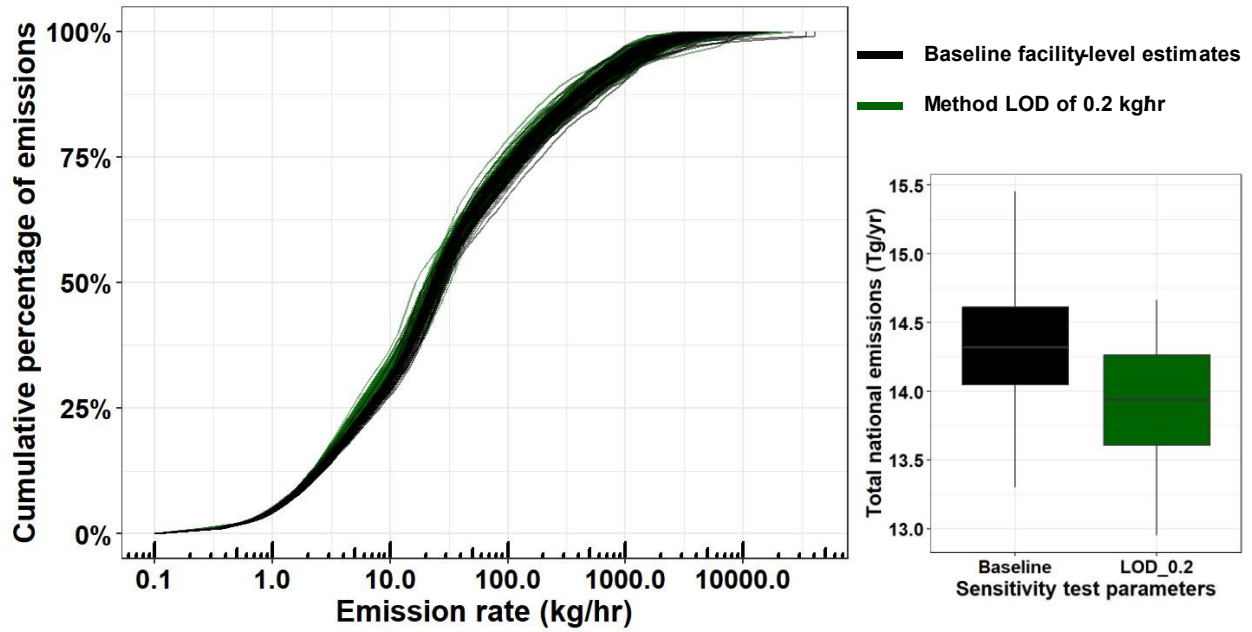

**Figure S13:** Results of a sensitivity analysis on the method limit of detection used in the facility-level estimates for both the national level oil/gas methane emission distributions (left) and total national methane emissions (right). A method LOD of 0.2 kg/hr was tested (dark green) against the baseline LOD of 0.1 kg/hr (black) for 100 model estimates each.

### Comparisons to Bridger Gas Mapping LiDAR remote sensing campaigns

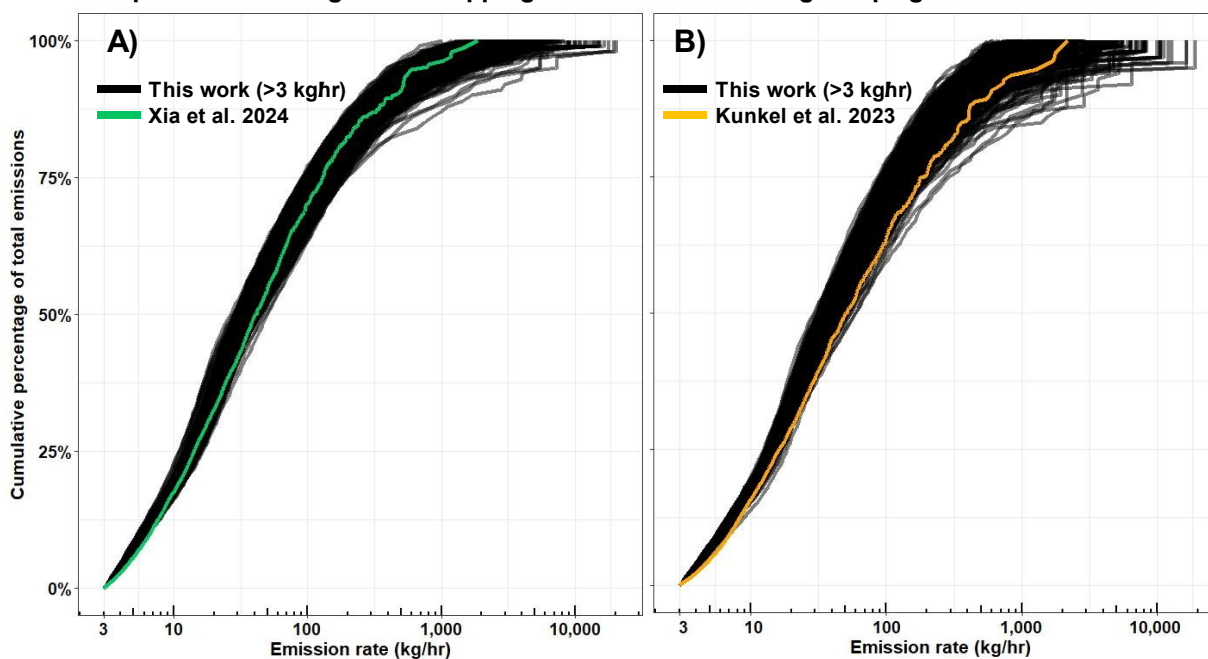

**Figure S14:** A) Comparison of our facility-level ensemble of methane emission distributions ( $n=500$ ) to the measured emissions from A) Xia et al. (2024) and B) Kunkel et al. (2023) for sources emitting above 3 kg/hr which is the approximate Bridger GML limit of detection. Spatial domains used for the comparisons of emission distribution curves are identical in Kunkel et al. (2023), and for Xia et al. (2024) we estimate emissions within the entire four-basin aggregate identified in their study since the actual aerial surveyed regions in their study are kept anonymous. Maps of all spatial boundaries used for comparisons are provided in Fig. S2.

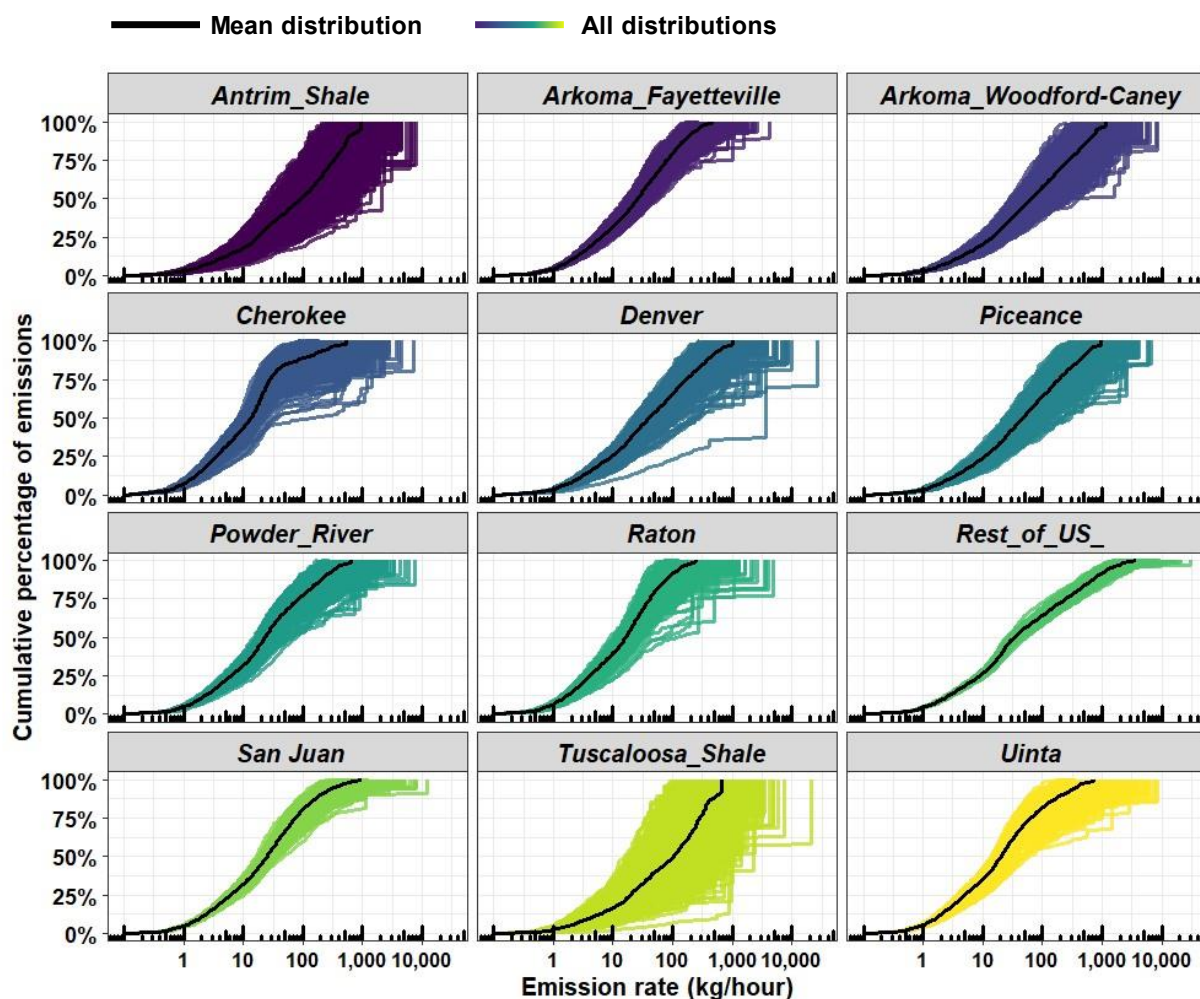

**Figure S15:** A) Results from 500 model simulations showing the cumulative methane emissions distribution curves for total upstream/midstream oil/gas methane emissions for the bottom eleven emitting oil/gas basins in the CONUS for 2021. The model averages for each basin are shown in the solid black lines. Inset dashed lines represent the percentage contributions of total emission from sources emitting <100 kg/hr. A map of the spatial boundaries used for the different oil/gas basins is shown in Fig. S16.

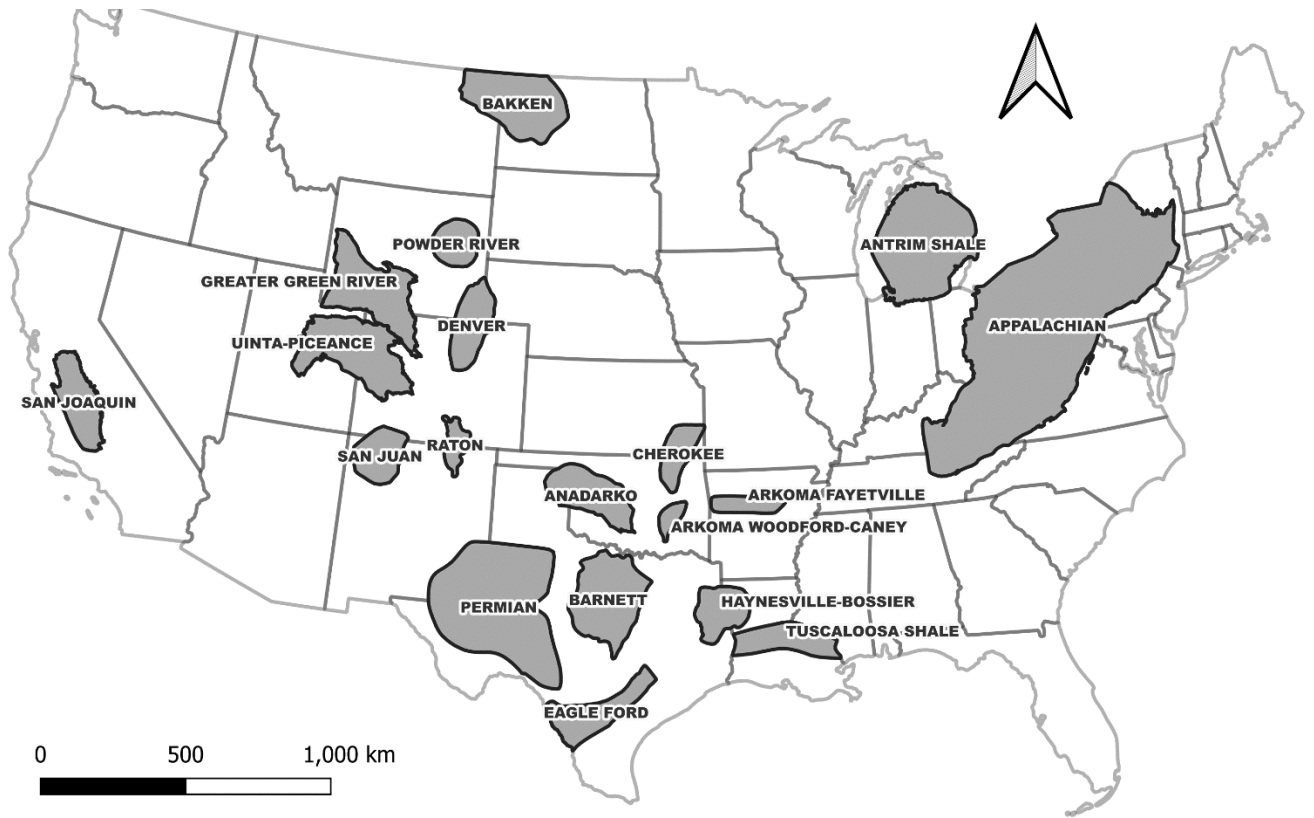

**Figure S16:** Map of contiguous United States (Alaska not shown) with oil/gas producing basins outlined in grey.



## Supplementary Tables

**Table S1:** Description of methods used to gather ground-based empirical measurements used in this work.

| <i>Study</i>                   | <i>Measurement method</i> | <i># of measurements</i> | <i>Facility category</i> |
|--------------------------------|---------------------------|--------------------------|--------------------------|
| <i>Brantley et al. 2014</i>    | OTM33a                    | 228                      | Well sites               |
| <i>Caulton et al. 2019</i>     | Gaussian                  | 564                      | Well sites               |
| <i>Deighton et al. 2020</i>    | HiFlow                    | 43                       | Well sites               |
| <i>Omara et al. 2016</i>       | Tracer release            | 35                       | Well sites               |
| <i>Omara et al. 2018</i>       | Gaussian                  | 52                       | Well sites               |
|                                | OTM33a                    | 9                        | Well sites               |
|                                | Tracer                    | 34                       | Well sites               |
| <i>Rella et al. 2015</i>       | Gaussian                  | 185                      | Well sites               |
| <i>Riddick et al. 2019</i>     | Chamber                   | 49                       | Well sites               |
| <i>Robertson et al. 2017</i>   | OTM33a                    | 149                      | Well sites               |
| <i>Robertson et al. 2020</i>   | OTM33a                    | 84                       | Well sites               |
| <i>Zhou et al. 2021</i>        | Gaussian                  | 66                       | Well sites               |
| <i>Mitchell et al. 2015</i>    | Tracer                    | 115                      | G&B compressors          |
| <i>Robertson et al. 2020</i>   | OTM33a                    | 3                        | G&B compressors          |
| <i>Zimmerle et al. 2020</i>    | HiFlow                    | 180                      | G&B compressors          |
| <i>Subramanian et al. 2015</i> | Tracer                    | 45                       | T&S compressors          |
| <i>Yacovitch et al. 2015</i>   | Tracer                    | 5                        | T&S compressors          |
| <i>Mitchell et al. 2015</i>    | Tracer                    | 16                       | Processing plants        |
| <i>Yacovitch et al. 2015</i>   | Tracer                    | 4                        | Processing plants        |

**Table S2:** Description of the locations where ground-based empirical measurements used in this work were gathered.

| <i>Oil/gas basin</i>       | <b>Facility category</b> | <b>Total # of measurements</b> | <i>Production well bins (Mcf/d)*</i> |                  |                   |                      |                        |                    |
|----------------------------|--------------------------|--------------------------------|--------------------------------------|------------------|-------------------|----------------------|------------------------|--------------------|
|                            |                          |                                | <b>(0 - 27)</b>                      | <b>(27 - 84)</b> | <b>(84 - 330)</b> | <b>(330 - 1,200)</b> | <b>(1,200 - 3,864)</b> | <b>(&gt;3,864)</b> |
| <i>Appalachian</i>         | Well sites               | 736                            | 224                                  | 74               | 18                | 74                   | 152                    | 194                |
| <i>Barnett</i>             | Well sites               | 228                            | 24                                   | 50               | 93                | 71                   | 19                     | 3                  |
|                            | T&S compressors          | 5                              |                                      |                  |                   |                      |                        |                    |
|                            | Processing plants        | 4                              |                                      |                  |                   |                      |                        |                    |
| <i>Denver-Julesburg</i>    | Well sites               | 110                            | 39                                   | 36               | 23                | 9                    | 2                      | 1                  |
| <i>Eagle Ford</i>          | Well sites               | 4                              | -                                    | 1                | 2                 | -                    | 1                      | -                  |
| <i>Fayetteville</i>        | Well sites               | 52                             | 3                                    | 4                | 11                | 22                   | 12                     | -                  |
| <i>Permian</i>             | Well sites               | 84                             | 19                                   | 17               | 17                | 21                   | 7                      | 3                  |
|                            | G&B compressors          | 3                              |                                      |                  |                   |                      |                        |                    |
| <i>San Joaquin</i>         | Well sites               | 66                             | 26                                   | 30               | 10                | -                    | -                      | -                  |
| <i>Uinta</i>               | Well sites               | 60                             | 14                                   | 22               | 16                | 6                    | 2                      | -                  |
| <i>Greater Green River</i> | Well sites               | 158                            | 9                                    | 22               | 44                | 33                   | 38                     | 12                 |
| <i>All the U.S. **</i>     | T&S compressors          | 45                             |                                      |                  |                   |                      |                        |                    |
|                            | G&B compressors          | 295                            |                                      |                  |                   |                      |                        |                    |
|                            | Processing plants        | 16                             |                                      |                  |                   |                      |                        |                    |
|                            |                          |                                |                                      |                  |                   |                      |                        |                    |

\*Production well bins are determined by gas production cohorts corresponding to empirical measurement data gathered for production well sites (i.e., not applicable for T&S compressors, G&B compressors, and processing plants).

\*\*All the US refers to empirical measurements sampled from multiple oil/gas producing regions in the US without data on the specific oil/gas basis from which the measurements were gathered.

**Table S3:** Comparison of total ONG methane emissions from our facility-level inventory to the target regions from other aerial-based remote sensing studies.

| <i>Remote sensing study comparison: total regional emissions</i> |                                       |                                                  | <i>This work</i>                                 |
|------------------------------------------------------------------|---------------------------------------|--------------------------------------------------|--------------------------------------------------|
| <b>Study</b>                                                     | <b>Oil/gas basin(s)</b>               | <b>Total oil/gas basin emissions (tonnes/hr)</b> | <b>Total oil/gas basin emissions (tonnes/hr)</b> |
| <i>MethaneAIR</i>                                                | Permian (RF-06) <sup>†</sup>          | 91 (62-115)                                      | 45 (38-55)                                       |
|                                                                  | Permian (MX-025) <sup>†</sup>         | 125                                              | 42 (33-61)                                       |
|                                                                  | Uinta (RF-08)                         | 15 (12-23)                                       | 11 (9-19)                                        |
| <i>Alvarez et al. 2018</i>                                       | Appalachian                           | 18 (4-32)                                        | 17 (10-43)                                       |
|                                                                  | Bakken                                | 27 (14-40)                                       | 36 (30-46)                                       |
|                                                                  | Barnett                               | 60 (49-71)                                       | 83 (72-100)                                      |
|                                                                  | Weld                                  | 19 (5-33)                                        | 14 (11-42)                                       |
|                                                                  | Fayetteville                          | 27 (19-35)                                       | 9 (6-15)                                         |
|                                                                  | Haynesville-Bossier                   | 73 (19-127)                                      | 65 (53-91)                                       |
|                                                                  | San Juan                              | 57 (3-111)                                       | 56 (47-66)                                       |
|                                                                  | West Arkoma                           | 26 (0-56)                                        | 7 (5-10)                                         |
|                                                                  | Uinta                                 | 55 (24-86)                                       | 11 (9-19)                                        |
| <i>Cusworth et al. 2022*</i>                                     | San Joaquin                           | 22 (17-27)                                       | 22 (18-29)                                       |
|                                                                  | Uinta                                 | 34 (28 – 40)                                     | 14 (11 – 21)                                     |
|                                                                  | Permian (Fall 2019) <sup>‡</sup>      | 415 (305-525)                                    | 226 (205-252)                                    |
|                                                                  | Permian (Summer 2020) <sup>‡</sup>    | 177 (118-236)                                    | 51 (43-73)                                       |
|                                                                  | Permian (Summer 2021) <sup>‡</sup>    | 181 (141-221)                                    | 55 (48-70)                                       |
|                                                                  | Permian (Fall 2021) <sup>‡</sup>      | 111 (83-139)                                     | 54 (46-65)                                       |
| <i>Chen et al. 2022</i>                                          | New Mexico - Permian                  | 194 (126 - 266)                                  | 76 (65 – 89)                                     |
| <i>Kunkel et al. 2023</i>                                        | Permian                               | 112                                              | 163 (146 - 194)                                  |
| <i>Xia et al. 2024**</i>                                         | Anadarko, Bakken, Eagle Ford, Permian | 162                                              | 478 (414 – 534)                                  |

\* Only surveys where 100% of point source detections were attributed to oil/gas sources are shown for comparison.

\*\* Simulations are based on total emissions from the entire four oil/gas basins, whereas the totals from Xia et al. 2024 are representative of the specific flow boundaries within these four basins which means the total emissions are likely not comparable.

† Both aerial surveys were combined for this oil/gas basin and study into one estimate presented in Fig. 7

‡ Four aerial surveys were combined for this oil/gas basin and study into one estimate presented in Fig. 7

**Table S4:** Description of remote sensing campaigns used for comparison to the facility-level model.

| <i>Study</i>                | <i>Flight UID*</i>   | <i>Oil/gas basin</i> | <i>Survey year(s)</i> | <i>Regional estimate method</i>                      | <i>Measurement platform</i>                    |
|-----------------------------|----------------------|----------------------|-----------------------|------------------------------------------------------|------------------------------------------------|
| <i>MethaneAIR</i>           | RF-06                | Permian              | 2021                  | MethaneAIR                                           | MethaneAIR                                     |
|                             | MX-025               | Permian              | 2023                  |                                                      |                                                |
|                             | RF-08                | Uinta                | 2021                  |                                                      |                                                |
| <i>Cusworth et al. 2022</i> | San Joaquin (F 2020) | San Joaquin          | Fall 2020             | TROPOMI inversions                                   | GAO and AVIRIS-NG                              |
|                             | Uinta (S 2020)       | Uinta                | Summer 2020           |                                                      |                                                |
|                             | Permian (F 2019)     | Permian              | Fall 2019             |                                                      |                                                |
|                             | Permian (S 2020)     | Permian              | Summer 2020           |                                                      |                                                |
|                             | Permian (S 2021)     | Permian              | Summer 2021           |                                                      |                                                |
|                             | Permian (F 2021)     | Permian              | Fall 2021             |                                                      |                                                |
| <i>Alvarez et al. 2018</i>  | Appalachian          | Appalachian          | Spring 2015           | -                                                    | Various mass-balance/tracer aircraft campaigns |
|                             | Bakken               | Bakken               | Spring 2014           |                                                      |                                                |
|                             | Barnett              | Barnett              | 2013                  |                                                      |                                                |
|                             | Weld                 | Denver-Julesburg     | Spring 2012           |                                                      |                                                |
|                             | Fayetteville         | Fayetteville         | Fall 2015             |                                                      |                                                |
|                             | Haynesville-Bossier  | Haynesville-Bossier  | Summer 2013           |                                                      |                                                |
|                             | San Juan             | San Juan             | Spring 2015           |                                                      |                                                |
|                             | West Arkoma          | West Arkoma          | Summer 2013           |                                                      |                                                |
|                             | Uinta                | Uinta                | Winter 2012           |                                                      |                                                |
| <i>Kunkel et al. 2023</i>   | Permian              | Permian              | -                     | -                                                    | Bridger GML                                    |
| <i>Chen et al. 2022</i>     | New Mexico - Permian | Permian              | 2018-2020             | Accounting of partial detections from aerial surveys | Kairos                                         |

|                        |                      |                                          |   |                                                          |             |
|------------------------|----------------------|------------------------------------------|---|----------------------------------------------------------|-------------|
| <i>Xia et al. 2024</i> | Four-basin aggregate | Anadarko, Bakken,<br>Eagle Ford, Permian | - | Combination of aerial<br>measurements and<br>simulations | Bridger GML |
|------------------------|----------------------|------------------------------------------|---|----------------------------------------------------------|-------------|

**Table S5:** Breakdown of total oil/gas methane emissions for the CONUS in 2021 contributed from different magnitudes of methane emission rates with the corresponding percentage of total facilities responsible for those emissions.

| <i>Emission rate threshold range (kg/hr)</i> | <i>Percentage of total emissions</i> |
|----------------------------------------------|--------------------------------------|
| $\leq 0.1$                                   | 0.2% (0.1 - 0.3%)                    |
| $0.1 - 1$                                    | 4.5% (4.0 - 5.1%)                    |
| $1 - 10$                                     | 26% (23- 29%)                        |
| $10 - 100$                                   | 42% (37 - 46%)                       |
| $100 - 1,000$                                | 22% (18 - 26%)                       |
| $>1,000$                                     | 6.1% (2.6 - 13%)                     |

**Table S6:** Results of Kolmogorov-Smirnov tests for goodness of fit of our facility-level methane emissions distributions to empirical measurements for each facility category including high-emitter and low-emitter categories. Note that p-values above  $p=0.05$  indicate that we cannot reject the null hypothesis that the empirical and our estimated methane emission distributions are significantly different.

| <i>Top 5% of emitters</i>                    | <i>K-S test (p-value)</i> | <i>Bottom 95% of emitters</i>                | <i>K-S test (p-value)</i> |
|----------------------------------------------|---------------------------|----------------------------------------------|---------------------------|
| <b>Production wells (0 - 27 boed)</b>        | 0.53                      | <b>Production wells (0 - 27 boed)</b>        | 0.24                      |
| <b>Production wells (27 - 84 boed)</b>       | 0.62                      | <b>Production wells (27 - 84 boed)</b>       | 0.57                      |
| <b>Production wells (84 - 330 boed)</b>      | 0.16                      | <b>Production wells (84 - 330 boed)</b>      | 0.73                      |
| <b>Production wells (330 - 1,200 boed)</b>   | 0.62                      | <b>Production wells (330 - 1,200 boed)</b>   | 0.77                      |
| <b>Production wells (1,200 - 3,864 boed)</b> | 0.97                      | <b>Production wells (1,200 - 3,864 boed)</b> | 0.53                      |
| <b>Production wells (&gt;3,864 boed)</b>     | 0.71                      | <b>Production wells (&gt;3,864 boed)</b>     | 0.89                      |
| <b>G&amp;B compressor stations</b>           | 0.07                      | <b>G&amp;B compressor stations</b>           | 0.37                      |
| <b>T&amp;S compressor stations</b>           | 0.93                      | <b>T&amp;S compressor stations</b>           | 0.25                      |
| <b>Processing plants</b>                     | 0.28                      | <b>Processing plants</b>                     | NA                        |
